# Supplementary material for: Long-Term Recovery of the Fecal Microbiome and Metabolome of Dogs with Steroid-Responsive Enteropathy
Source: MDPI journal article supplement (doi:10.3390/ani11092498), 2021-08-25

**Supplementary figure S2:** Abundance of fecal metabolites (n=30) found to be significantly affected by SRE, organized in alphabetic order. Red asterisks indicate statistical significance compared to healthy controls.

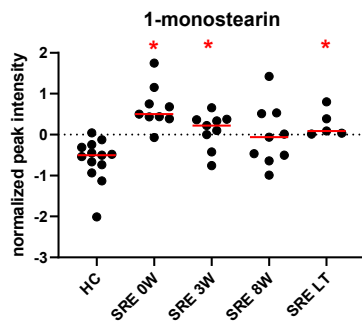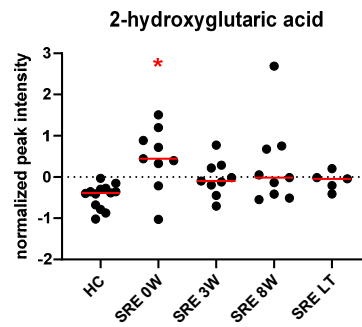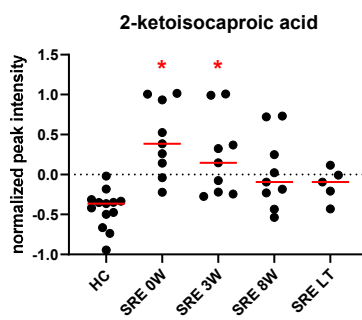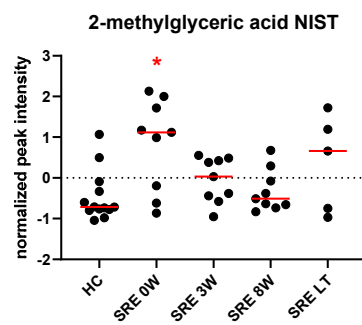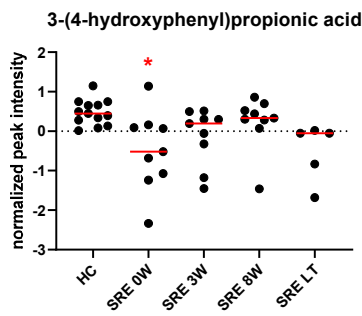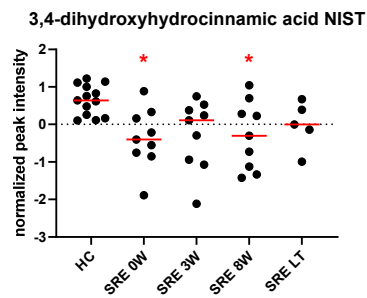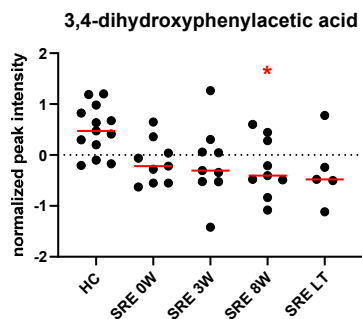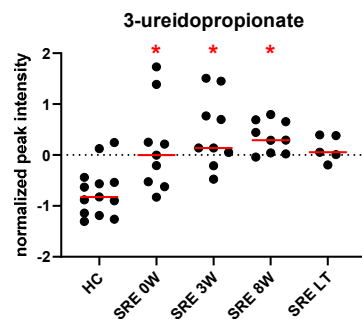

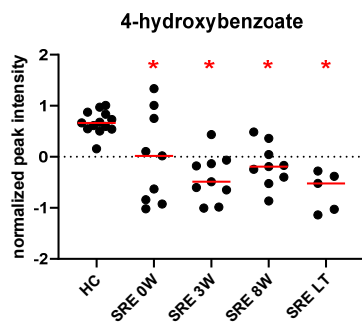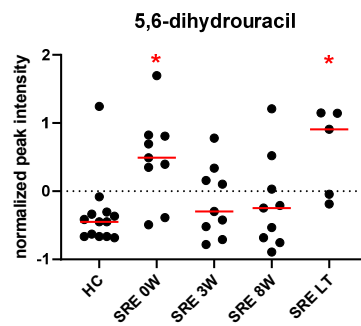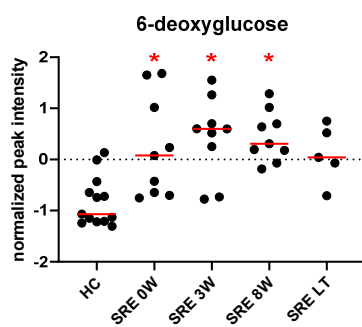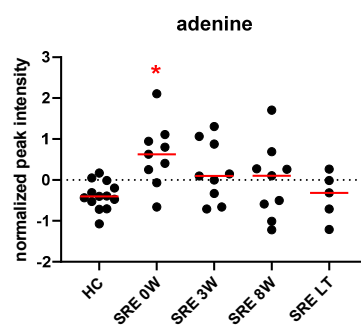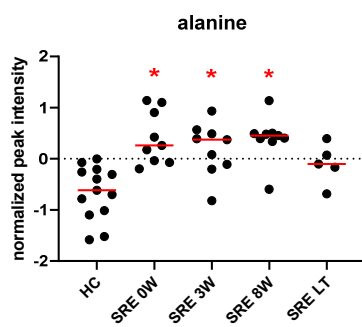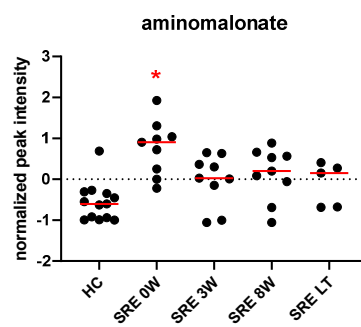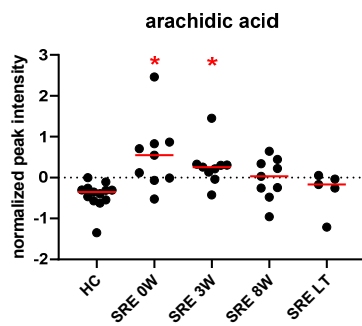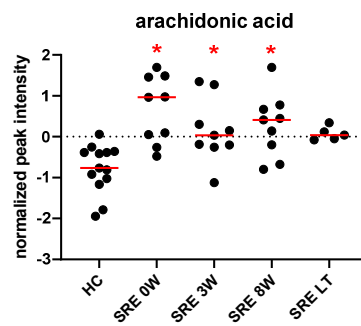

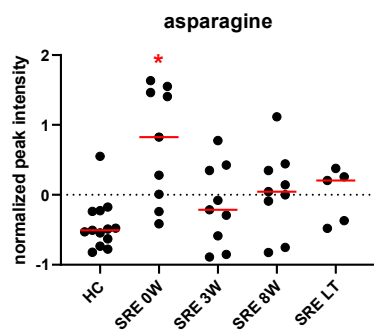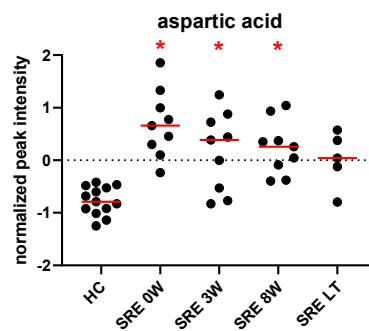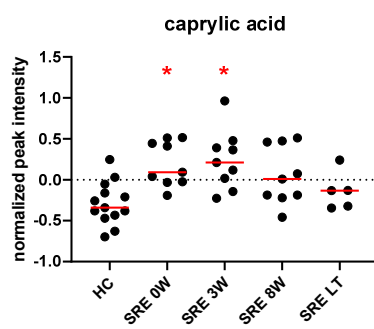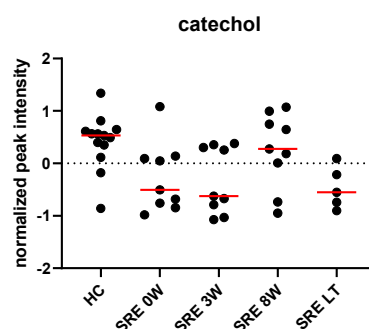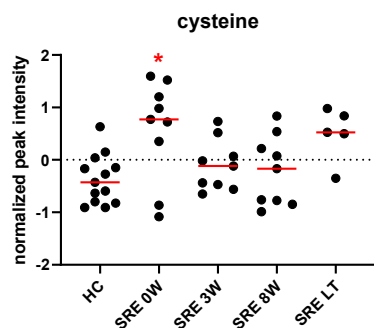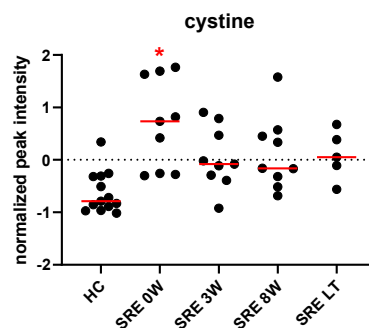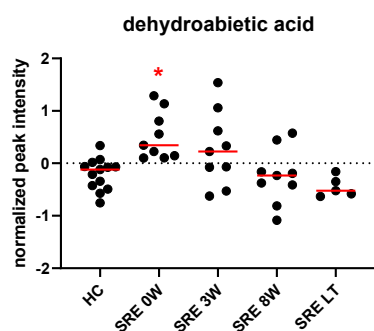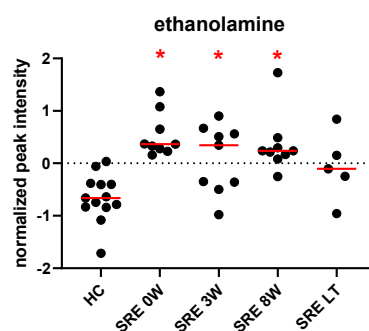

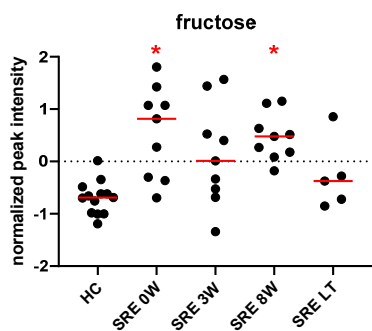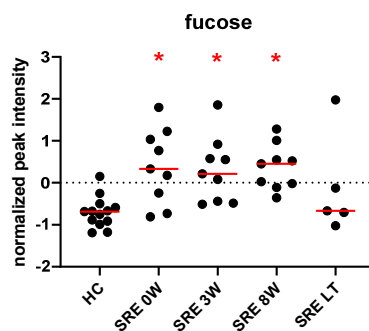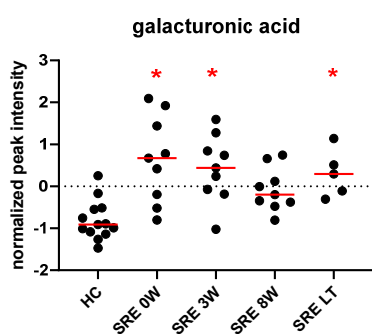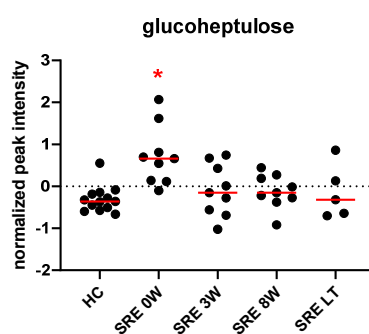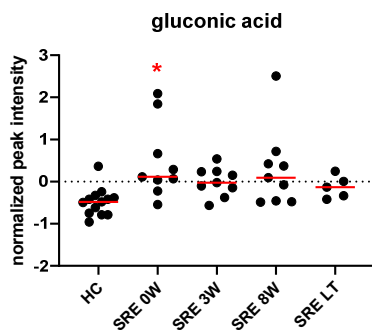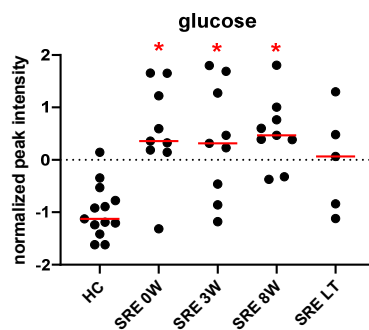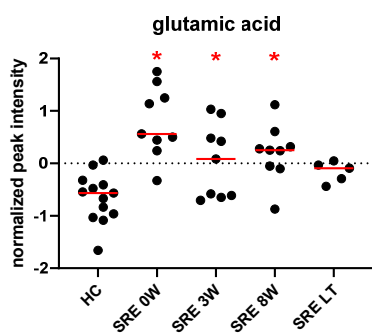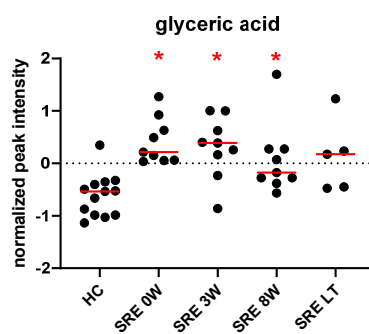

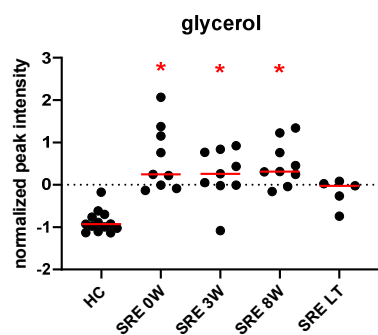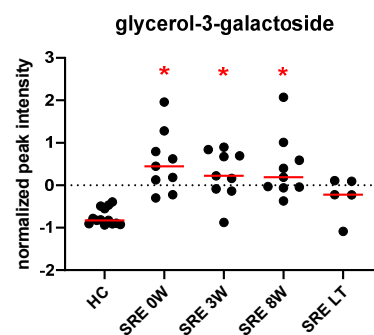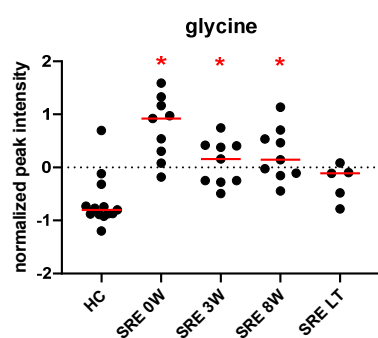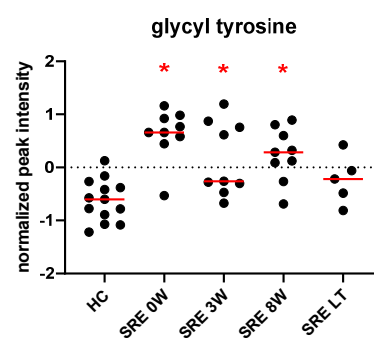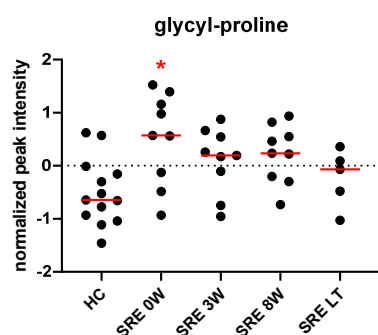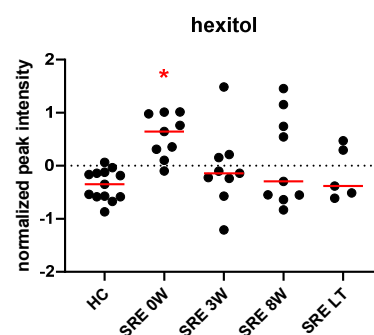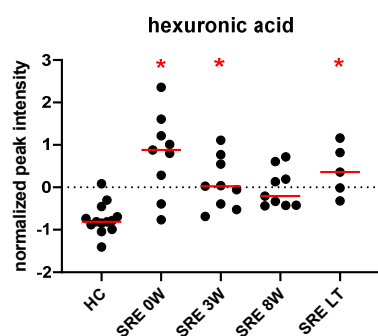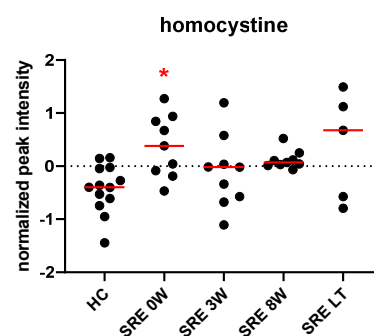

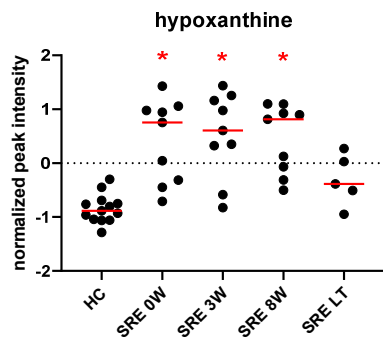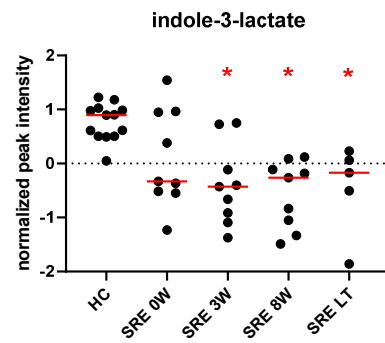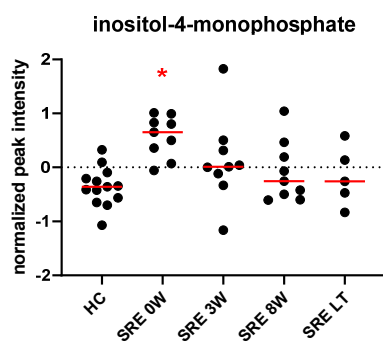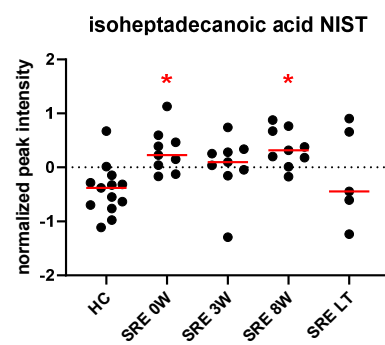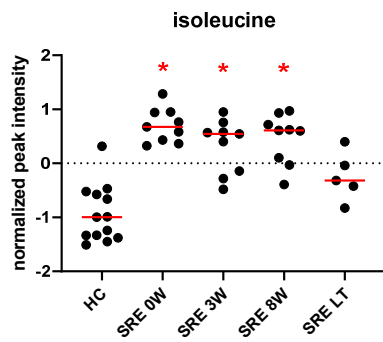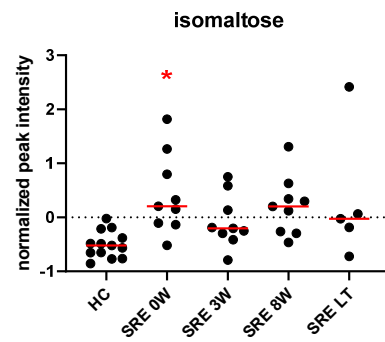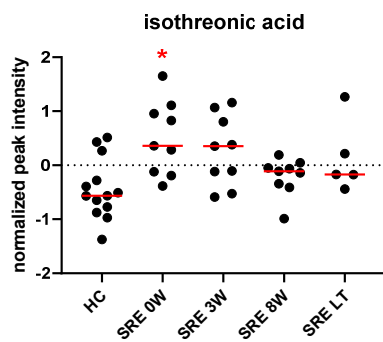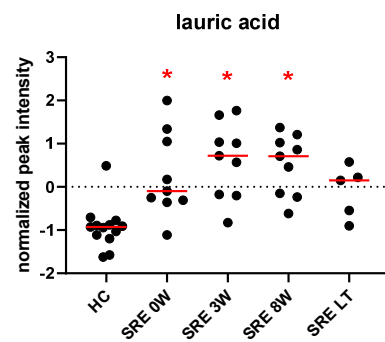

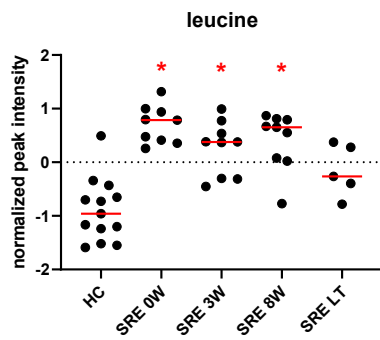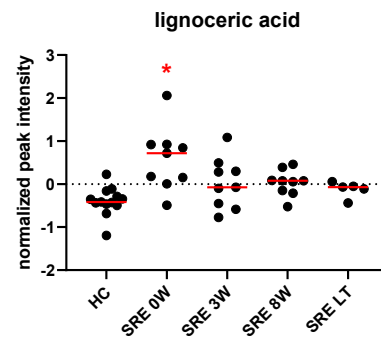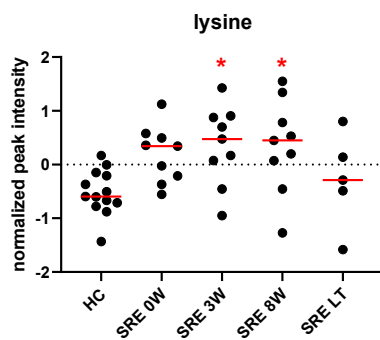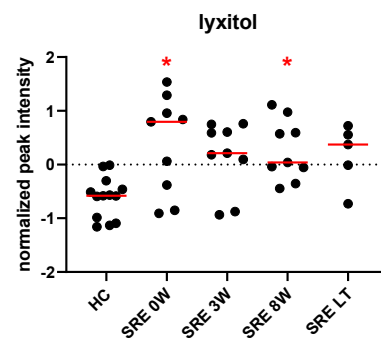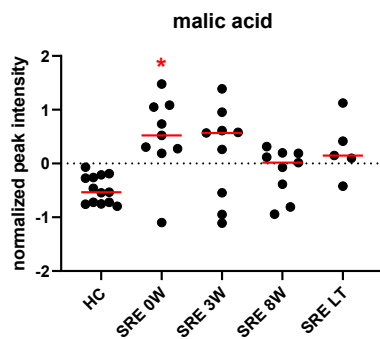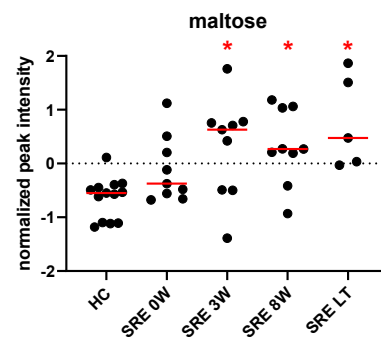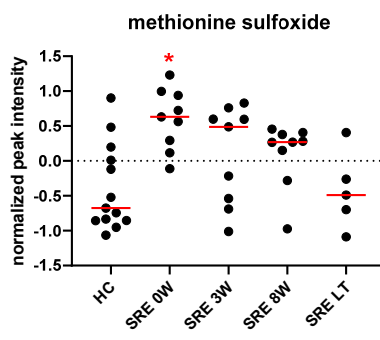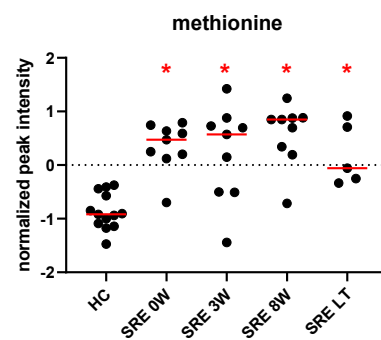



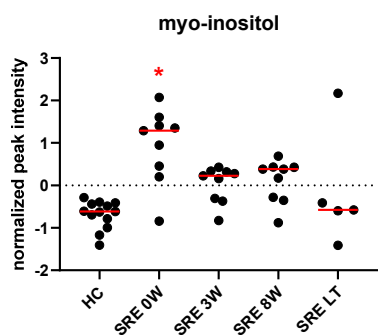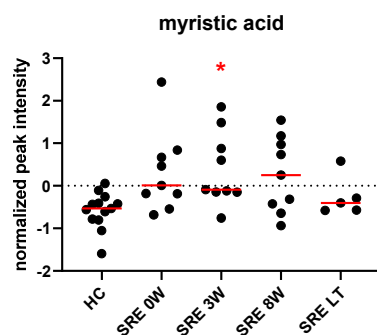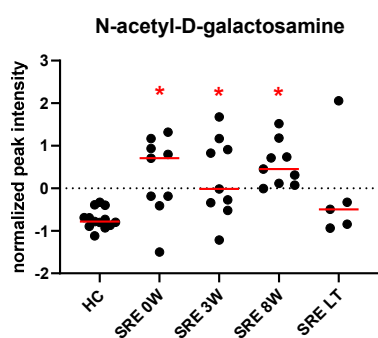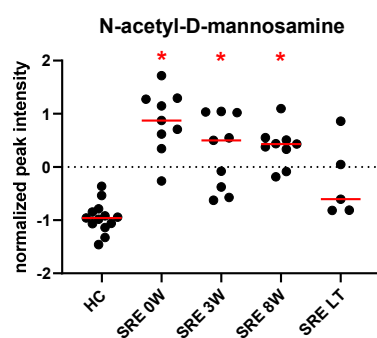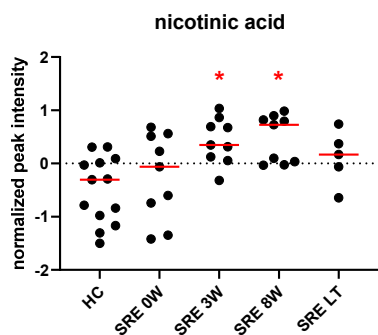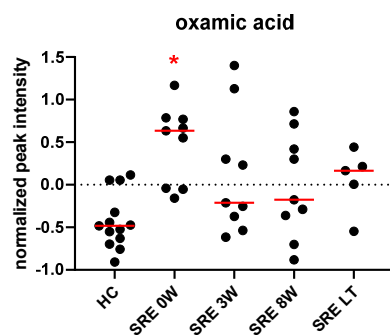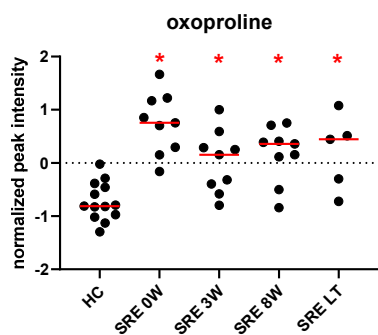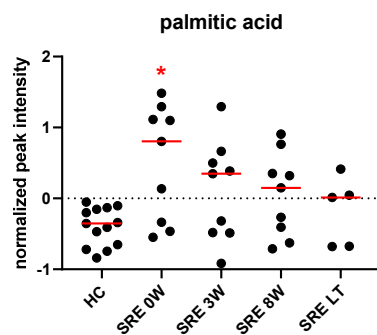

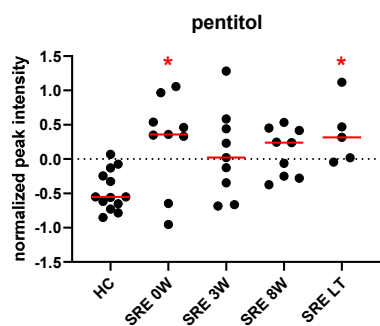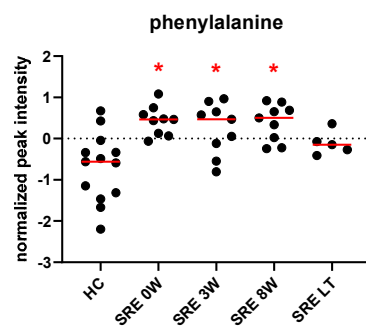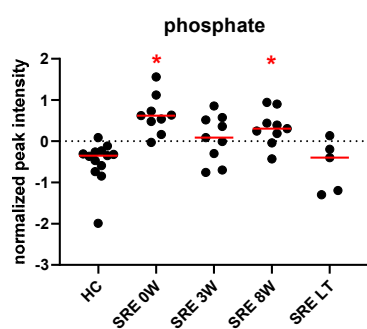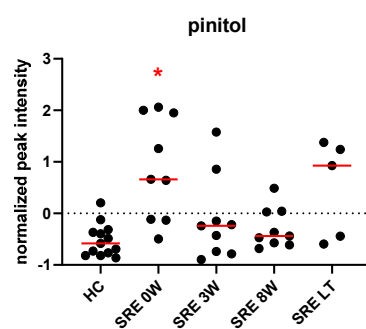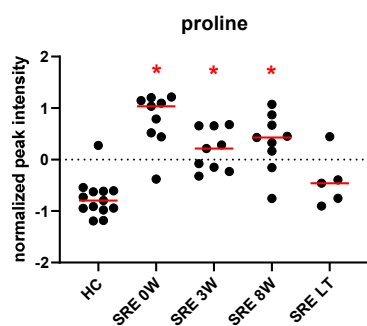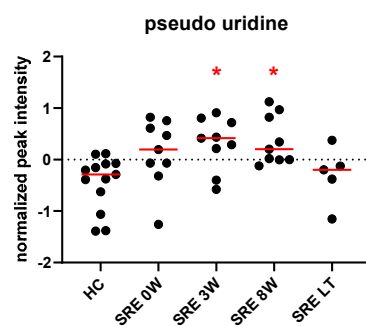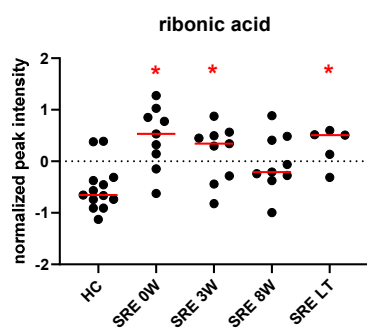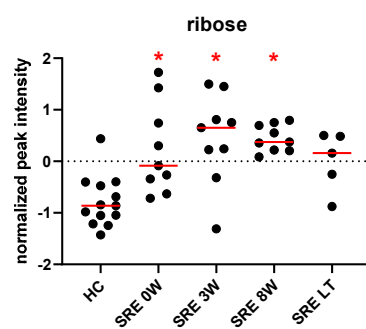

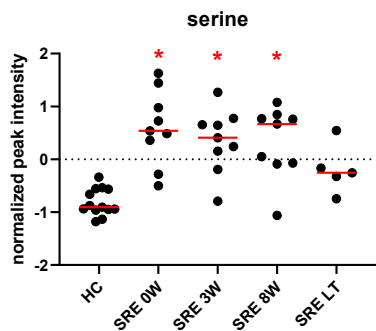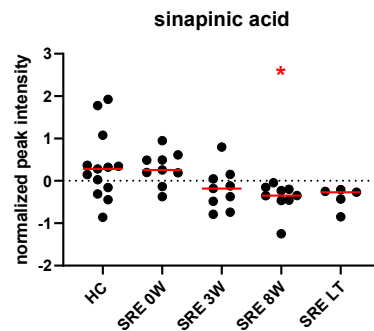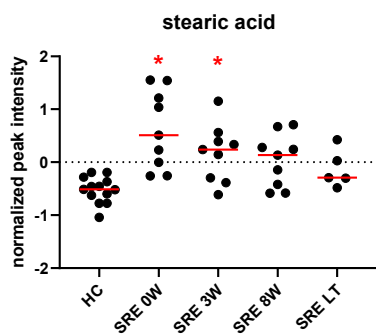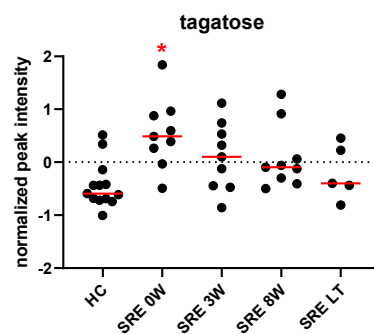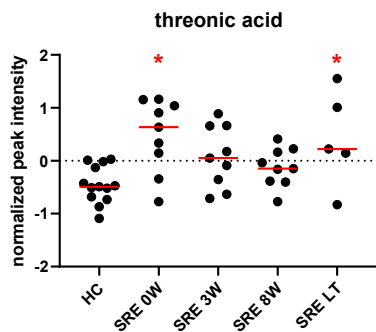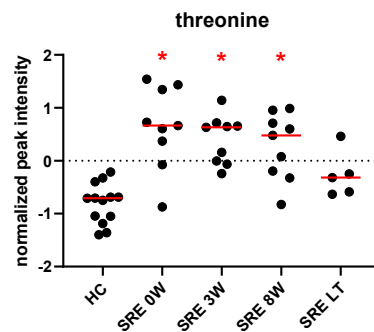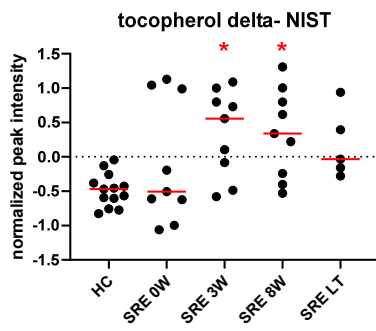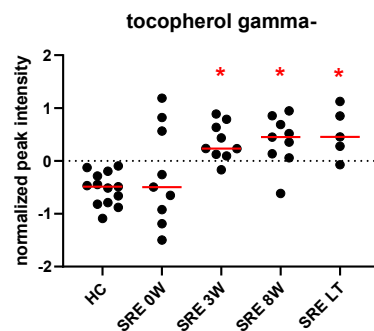

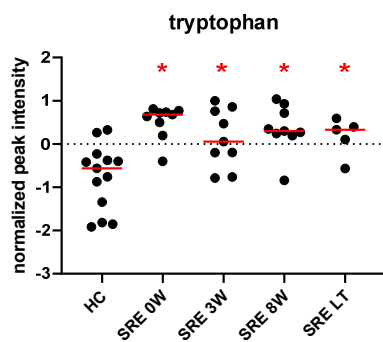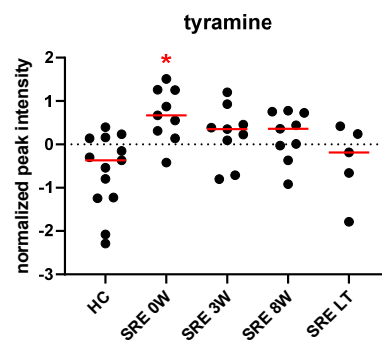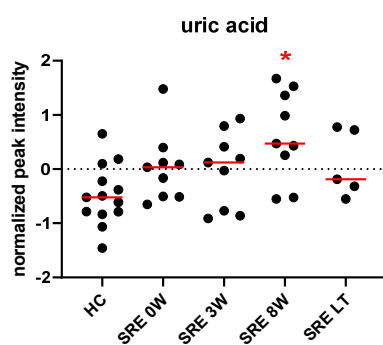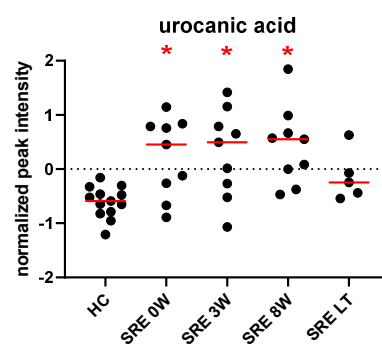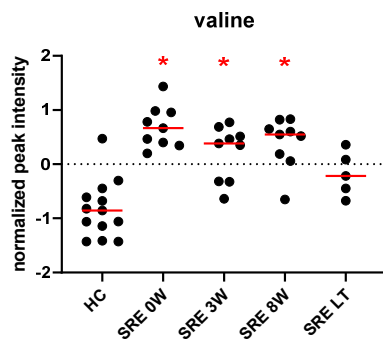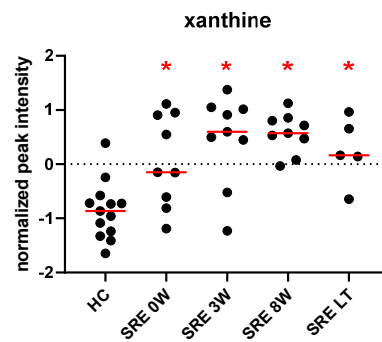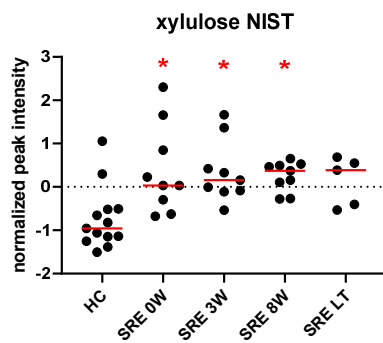

Supplement: s1 [file s1]
