# Supplementary material for: Long-Term Recovery of the Fecal Microbiome and Metabolome of Dogs with Steroid-Responsive Enteropathy
Source: MDPI journal article supplement (doi:10.3390/ani11092498), 2021-08-25

**Supplementary figure S3:** Heatmap of the top 25 metabolites found in feces of healthy control dogs, and dogs with SRE over time. Note the less pronounced inter-individual variation in the healthy controls compared to the inter-individual variation in dogs with SRE at baseline.

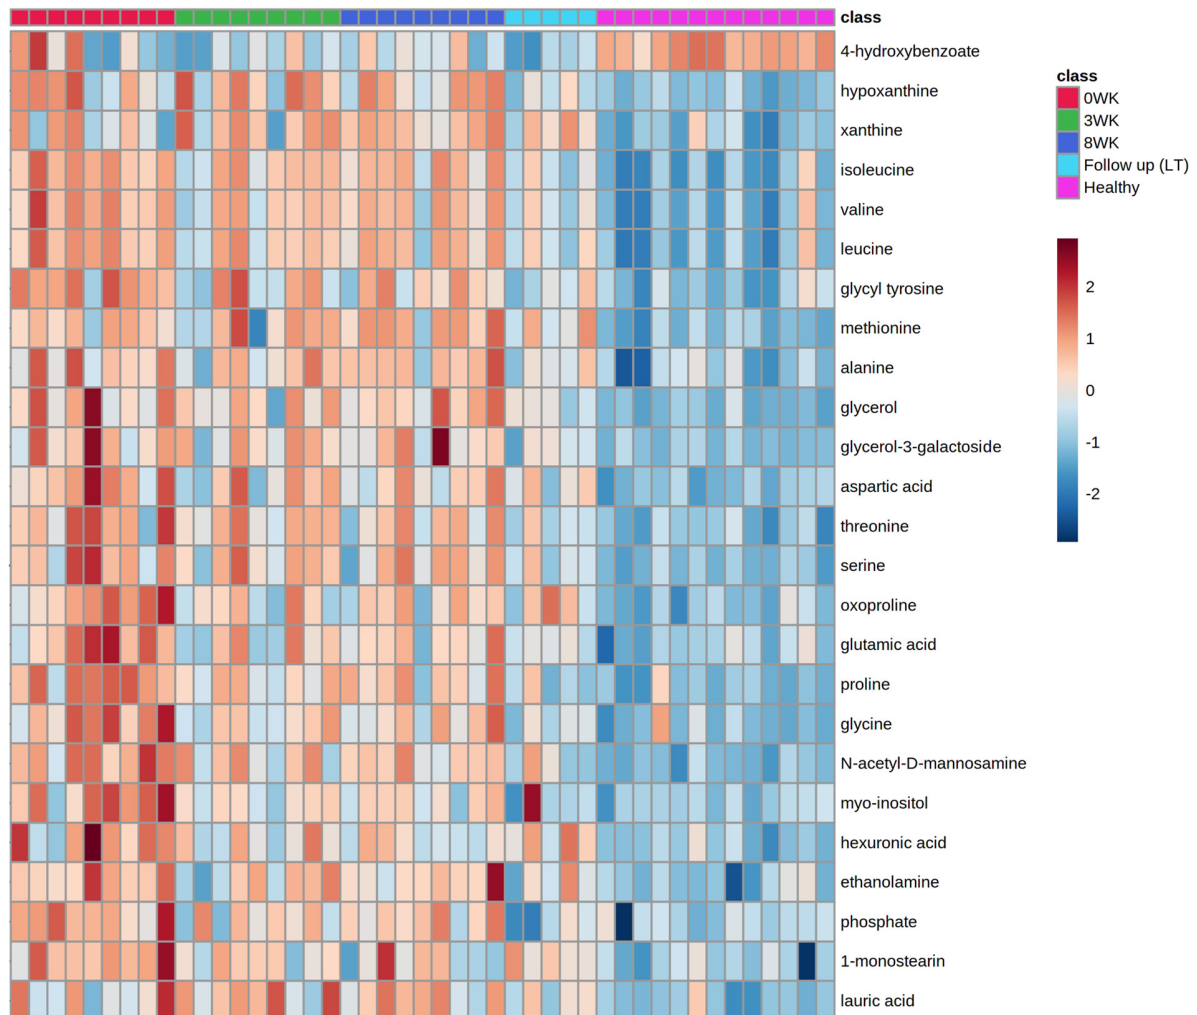

Supplement: s1 [file s1]
