# Supplementary material for: Long-Term Recovery of the Fecal Microbiome and Metabolome of Dogs with Steroid-Responsive Enteropathy
Source: MDPI journal article supplement (doi:10.3390/ani11092498), 2021-08-25

**Supplementary figure S1:** Alpha diversity parameters Chao1, Observed ASVs, and Shannon Index in healthy controls (HC) and dogs with SRE over time. No statistical significance was found.

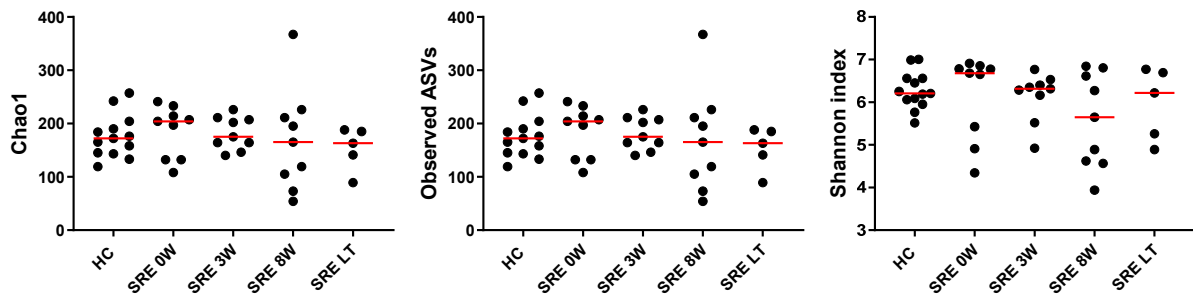

Supplement: s1 [file s1]
